# Supplementary material for: Evolution and phylogeny of the deep-sea isopod families Desmosomatidae Sars, 1897 and Nannoniscidae Hansen, 1916 (Isopoda: Asellota)
Source: PubMed Central journal article supplement (PMC8510888; doi:10.1007/s13127-021-00509-9), 2021-10-13
Supplement: 13127_2021_509_MOESM6_ESM.pdf [file 13127_2021_509_MOESM6_ESM.pdf]

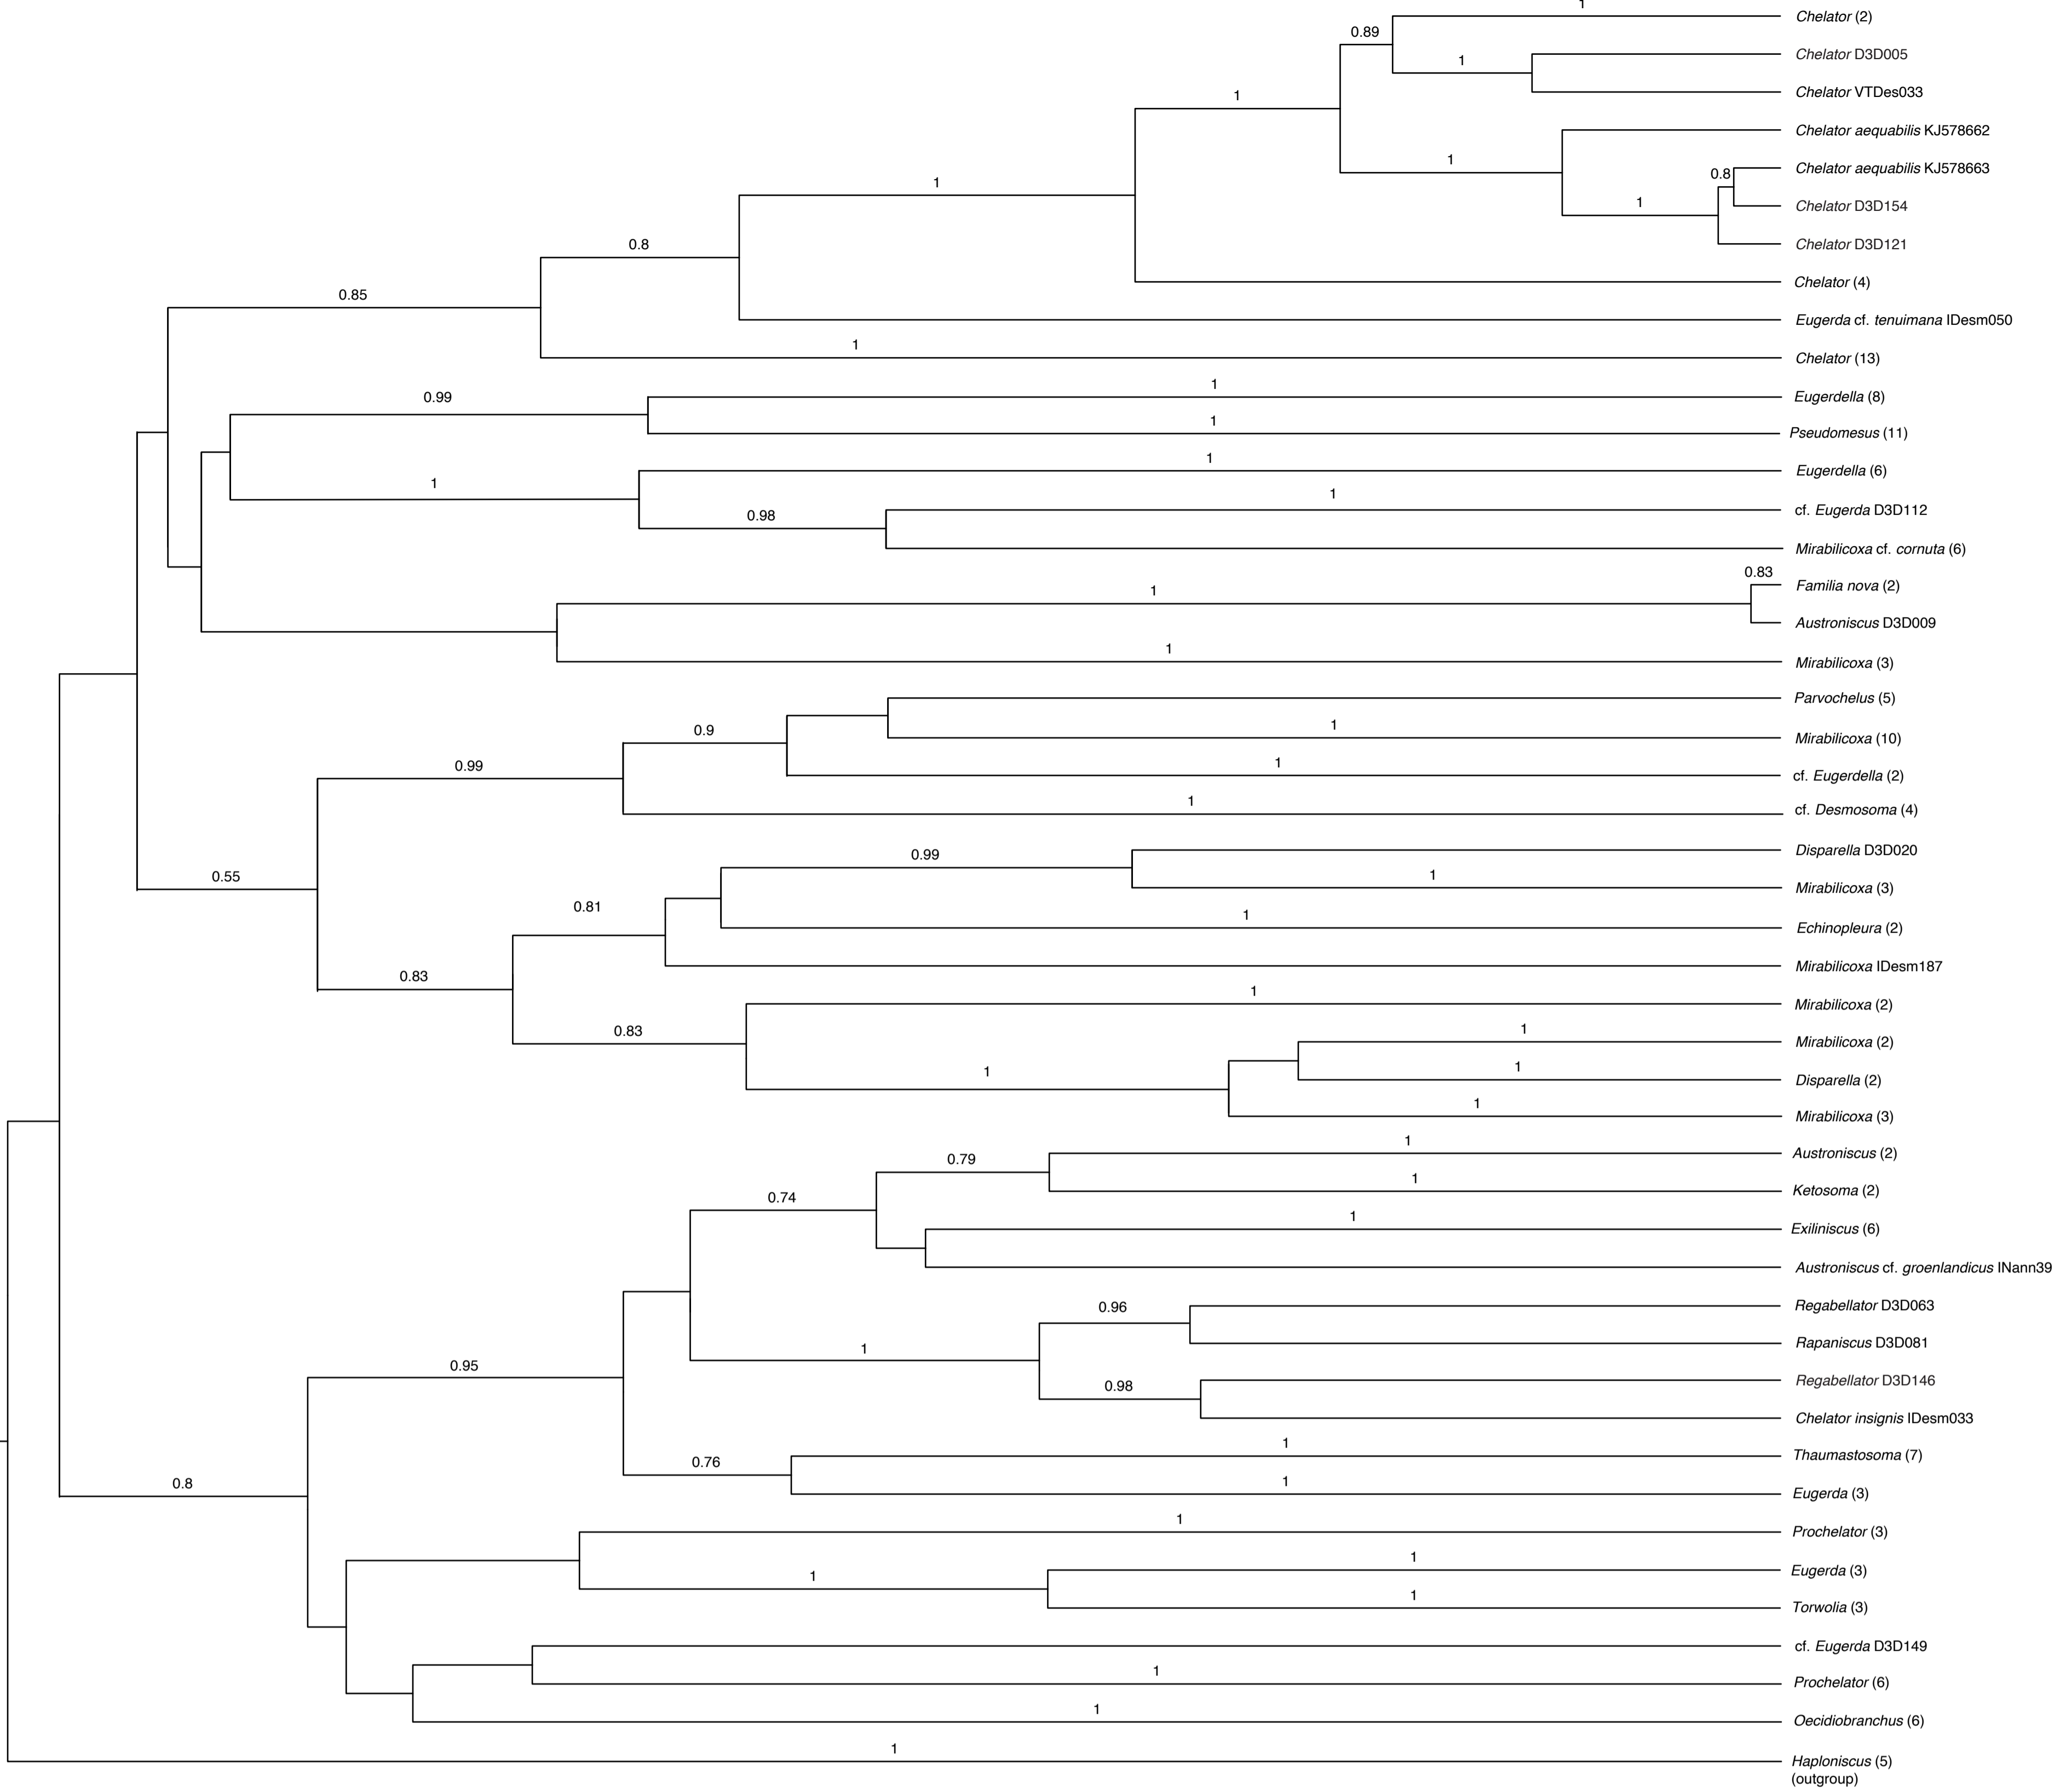

3.0E-4
